# Supplementary material for: Predicting Sepsis Mortality in a Population-Based National Database: Machine Learning Approach
Source: PubMed Central journal article supplement (PMC9047761; doi:10.2196/29982), 2022-04-13
Supplement: jmir_v24i4e29982_app3.pdf [file jmir_v24i4e29982_app3.pdf]

```

#setwd("/Users/hojoshua/Desktop/Monica")
setwd("/root/H2O-1")

#####

# Install and import Dependencies
#####

# install packages required for the models
libraries <- c("glmnet", "rpart", "party", "partykit", "gbm", "SuperLearner", "fastDummies", "tensorflow",
              "ranger", "rms", "pROC", "keras", "data.table", "xgboost", "reportROC", "SHAPforxgboost",
              "parallel")

lapply(libraries, require, character.only = TRUE)

#New package
#library(microbenchmark)
library(h2o)
h2o.init(nthreads=detectCores()-1, max_mem_size="40G")
h2o.removeAll() ## clean slate - just in case the cluster was already running

#####

# Import a binary outcome train/test set into H2O#
#####

# Import a sample binary outcome train/test set into H2O
train <- h2o.importFile("/root/H2O-1/sepsis_train_small.txt") # use abs path
test <- h2o.importFile("/root/H2O-1/sepsis_validation_small.txt") # use abs path

y <- "DIED"
x <- setdiff(names(train), y)

```

```
train[,y] <- as.factor(train[,y])
```

```
test[,y] <- as.factor(test[,y])
```

```
nfolds <- 10
```

```
#####
```

```
# rf model #
```

```
#####
```

```
s2 <- Sys.time()
```

```
my_rf <- h2o.randomForest(x = x,
```

```
  y = y,
```

```
  training_frame = train,
```

```
  ntrees = 400,
```

```
  mtries=500,
```

```
  nfolds=10, #this has to be the same, by JH
```

```
  keep_cross_validation_predictions = TRUE,
```

```
  seed = 1) #this has to be the same, by JH
```

```
t2 <- Sys.time()-s2
```

```
# Save this module for the future
```

```
model_my_rf <- h2o.saveModel(object = my_rf, path = getwd(), force = TRUE)
```

```
fwrite(as.list(t2),"t2.txt")
```

```
#####
```

```
# XGB model not available on windows OS#
```

```
#####
```

```
s3 <- Sys.time()
```

```

XGB <- h2o.xgboost(x = x,
  y = y,
  training_frame = train,
  eta = 0.15,
  max_depth = 10,
  #nthread = 10,
  stopping_metric = "AUC",
  stopping_rounds = 50,
  ntrees = 400,
  nfolds=10, #this has to be the same, by JH
  distribution = 'bernoulli',
  keep_cross_validation_predictions = TRUE, #need this, by JH
  seed=1) #this has to be the same, by JH

t3 <- Sys.time()-s3

# Save this module for the future

model_XGB <- h2o.saveModel(object = XGB, path = getwd(), force = TRUE)

fwrite(as.list(t3),"t3.txt")

#####

# ensemble model not available on windows OS#

#####

s4 <- Sys.time()

ensemble <- h2o.stackedEnsemble(x = x,
  y = y,
  training_frame = train,
  base_models = list(my_rf,XGB))

t4 <- Sys.time()-s4

# Save this module for the future

model_ensemble <- h2o.saveModel(object = ensemble, path = getwd(), force = TRUE)

```

```
fwrite(as.list(t4), "t4.txt")
```

```
#####
```

```
# Performance#
```

```
#####
```

```
perf <- h2o.performance(ensemble, newdata = test)
```

```
ensemble_auc_test <- h2o.auc(perf)
```

```
perf_rf_test <- h2o.performance(my_rf, newdata = test)
```

```
perf_XGB_test <- h2o.performance(XGB, newdata = test)
```

```
baselearner_best_auc_test <- max(h2o.auc(perf_rf_test),  
                                h2o.auc(perf_XGB_test))
```

```
print(sprintf("Best Base-learner Test AUC: %s", baselearner_best_auc_test))
```

```
print(sprintf("Ensemble Test AUC: %s", ensemble_auc_test))
```

```
# [1] "Best Base-learner Test AUC: 0.76979821502548"
```

```
# [1] "Ensemble Test AUC: 0.773501212640419"
```
